# Supplementary material
Source: HighWire-hosted journal article supplement (http://www.cmajopen.ca/highwire/filestream/81252/field_highwire_adjunct_files/1/2019-0189-2-at.pdf)
Supplement: 2019-0189-2-at.pdf [file 2019-0189-2-at.pdf]

## Appendix 2 (as supplied by the authors): Supplemental tables

**Supplemental Table S1** Fees for Uninsured Services by Physician Characteristics

|                      | Block Fee |                      | À La Carte Only |                      | No Fees |                      | Unknown |                     | P-Value |
|----------------------|-----------|----------------------|-----------------|----------------------|---------|----------------------|---------|---------------------|---------|
|                      | n         | %<br>(95% CI)        | n               | %<br>(95% CI)        | n       | %<br>(95% CI)        | n       | %<br>(95% CI)       |         |
| <b>Total</b>         | 33        | 20.3<br>(14.8, 27.3) | 97              | 58.3<br>(50.6, 65.8) | 19      | 11.4<br>(7.4, 17.3)  | 17      | 9.7<br>(6.1, 15.3)  | -       |
| <b>Geography</b>     |           |                      |                 |                      |         |                      |         |                     |         |
| Large Urban          | 28        | 25.0<br>(17.8, 33.9) | 64              | 57.1<br>(47.8, 66.0) | 10      | 8.9<br>(4.9, 15.8)   | 10      | 8.9<br>(4.9, 15.8)  | 0.04    |
| Small/Medium         | 3         | 10.4<br>(3.4, 27.8)  | 20              | 68.9<br>(50.2, 83.0) | 4       | 13.9<br>(5.3, 31.6)  | 2       | 6.9<br>(1.7, 23.6)  |         |
| Rural                | 2         | 4.5<br>(1.2, 15.5)   | 13              | 47.5<br>(27.3, 68.5) | 5       | 25.8<br>(10.9, 49.7) | 5       | 22.2<br>(8.7, 46.0) |         |
| <b>Payment Model</b> |           |                      |                 |                      |         |                      |         |                     |         |
| Fee-For-Service      | 25        | 19.4<br>(13.9, 27.8) | 74              | 58.5<br>(49.7, 66.7) | 15      | 11.5<br>(7.1, 18.2)  | 13      | 10.0<br>(5.9, 16.5) | 0.99    |
| Capitation-Based     | 8         | 22.0<br>(10.8, 39.5) | 23              | 58.2<br>(40.9, 73.7) | 4       | 11.0<br>(3.9, 27.4)  | 4       | 8.8<br>(2.9, 23.7)  |         |

*Notes:* Unweighted sample sizes and weighted prevalence. Statistical significance is from a survey design-based Pearson chi-square test of the null hypothesis that there is no association between fee structure and geography or payment model (i.e. the categorical variables are independent).

## Supplemental Table S2 Area-Level Demographics by Fee Structure

| Area-Level Demographics§                 | Block Fee                           | À La Carte Only                     | No Fees                             | Unknown                             | P-Value |
|------------------------------------------|-------------------------------------|-------------------------------------|-------------------------------------|-------------------------------------|---------|
| Mean Age                                 | 39.9<br>(39.0, 40.7)                | 41.2<br>(40.5, 41.9)                | 40.3<br>(38.6, 41.9)                | 41.4<br>(39.7, 43.0)                | 0.09    |
| % Population Over Age 65                 | 14.5<br>(13.3, 15.7)                | 17.2<br>(16.2, 18.2)                | 15.9<br>(13.3, 18.4)                | 17.9<br>(15.4, 20.4)                | 0.01    |
| Mean After-Tax Household Income          | \$81 416<br>(\$74 707,<br>\$88 125) | \$77 927<br>(\$73 591,<br>\$82 263) | \$79 683<br>(\$71 911,<br>\$87 455) | \$72 706<br>(\$62 971,<br>\$82 440) | 0.53    |
| % After-Tax Low Income<br>(Adults 18-64) | 15.9<br>(13.5, 18.4)                | 15.5<br>(13.8, 17.2)                | 13.5<br>(10.0, 17.0)                | 18.6<br>(14.9, 22.2)                | 0.27    |

Notes: Weighted proportions and means. Statistical significance from survey-weighted F-test of the null hypothesis that the mean area-level demographics are equal across physician fee structure (i.e. there is not at least one pairwise difference). §Area level demographics are measured at the forward sortation area level (first three digits of the postal code).

## Supplemental Table S3 Individual and Family Block Fee Amounts

|            | Mean  | 95% CI         | Range    | Unknown<br>(N, %) |
|------------|-------|----------------|----------|-------------------|
| Individual | \$106 | (\$92, \$121)  | \$34-150 | 9 (27%)           |
| Family     | \$194 | (\$171, \$217) | \$75-250 | 12 (36%)          |

Notes: Weighted means and 95% confidence intervals.
